# Supplementary material
Source: PubMed Central journal article supplement (PMC547819)

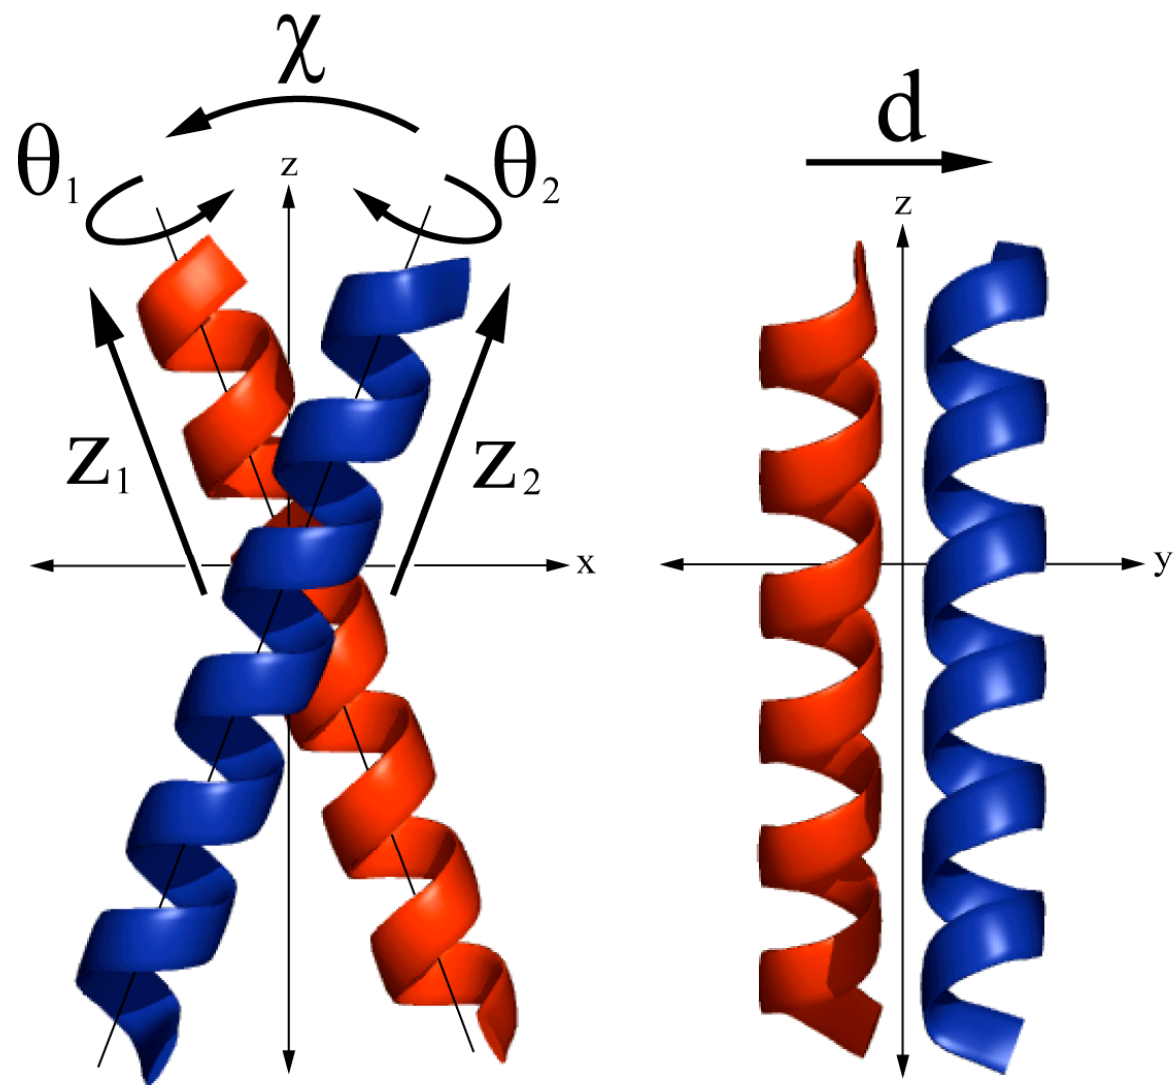

Supplement: pnas_102_5_1424__1.pdf [file pnas_102_5_1424__1.pdf]

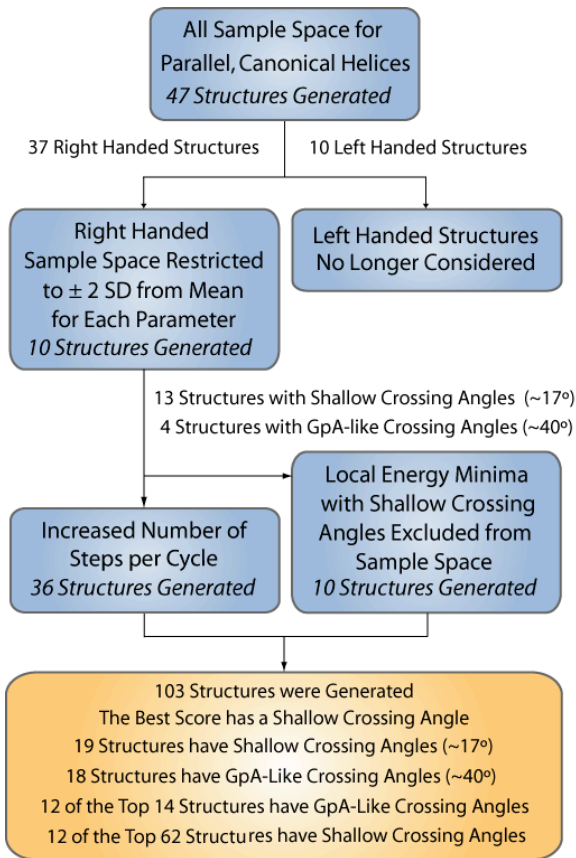

Supplement: pnas_102_5_1424__2.pdf [file pnas_102_5_1424__2.pdf]
